# Supplementary material for: Chloroplast Genome Evolution in Early Diverged Leptosporangiate Ferns
Source: PubMed Central journal article supplement — Mol Cells. 2014 May 14;37(5):372–82. doi: 10.14348/molcells.2014.2296 (PMC4044308; doi:10.14348/molcells.2014.2296), 2014-05-14
Supplement: molcell-37-5-372-3_supple.pdf [file molcell-37-5-372-3_supple.pdf]

Supplementary table 1. The list of GC contents and ENC of 194 chloroplast genomes

| Taxa                                                  | Group                                                         | GenBank  | ENC<br>(mean) | GC1  | GC2  | GC3  | GCall |
|-------------------------------------------------------|---------------------------------------------------------------|----------|---------------|------|------|------|-------|
| <i>Anthoceros formosae</i>                            | Anthocerotophyta                                              | NC004543 | 41.6          | 0.44 | 0.39 | 0.22 | 0.35  |
| <i>Nothoceros aenigmaticus</i>                        | Anthocerotophyta                                              | NC020259 | 44.7          | 0.44 | 0.38 | 0.27 | 0.36  |
| <i>Physcomitrella patens</i> subsp.<br><i>patens</i>  | Bryophyta                                                     | NC005087 | 34.8          | 0.41 | 0.35 | 0.13 | 0.3   |
| <i>Syntrichia ruralis</i>                             | Bryophyta                                                     | NC012052 | 35            | 0.41 | 0.35 | 0.13 | 0.3   |
| <i>Aneura mirabilis</i>                               | Marchantiophyta                                               | NC010359 | 47.8          | 0.46 | 0.4  | 0.32 | 0.39  |
| <i>Marchantia polymorpha</i>                          | Marchantiophyta                                               | NC001319 | 34.6          | 0.43 | 0.36 | 0.12 | 0.3   |
| <i>Pellia endiviifolia</i>                            | Marchantiophyta                                               | NC019628 | 45.1          | 0.44 | 0.37 | 0.26 | 0.36  |
| <i>Ptilidium pulcherrimum</i>                         | Marchantiophyta                                               | NC015402 | 40.2          | 0.43 | 0.37 | 0.2  | 0.33  |
| <i>Huperzia lucidula</i>                              | Lycopodiophyta                                                | NC006861 | 44.9          | 0.46 | 0.38 | 0.26 | 0.37  |
| <i>Isoetes flaccida</i>                               | Lycopodiophyta                                                | NC014675 | 47            | 0.47 | 0.39 | 0.28 | 0.38  |
| <i>Selaginella moellendorffii</i>                     | Lycopodiophyta                                                | NC013086 | 54            | 0.56 | 0.51 | 0.45 | 0.51  |
| <i>Selaginella uncinata</i>                           | Lycopodiophyta                                                | AB197035 | 55.4          | 0.59 | 0.55 | 0.49 | 0.54  |
| <i>Adiantum capillus-veneris</i>                      | Moniliformopses<br>(core leptosporangiate ferns)              | NC004766 | 52            | 0.47 | 0.41 | 0.37 | 0.42  |
| <i>Cheilanthes lindheimeri</i>                        | Moniliformopses<br>(core leptosporangiate ferns)              | NC014592 | 52.2          | 0.48 | 0.41 | 0.38 | 0.42  |
| <i>Pteridium aquilinum</i> subsp.<br><i>aquilinum</i> | Moniliformopses<br>(core leptosporangiate ferns)              | NC014348 | 52.1          | 0.48 | 0.41 | 0.36 | 0.41  |
| <i>Alsophila spinulosa</i>                            | Moniliformopses<br>(core leptosporangiate ferns)              | NC012818 | 51.3          | 0.47 | 0.41 | 0.34 | 0.41  |
| <i>Marsilea crenata</i>                               | Moniliformopses<br>(core leptosporangiate ferns)              | KC536646 | 52.7          | 0.49 | 0.41 | 0.37 | 0.42  |
| <i>Lygodium japonicum</i>                             | Moniliformopses<br>(early diverged<br>leptosporangiate ferns) | KF225593 | 49.7          | 0.47 | 0.4  | 0.36 | 0.41  |
| <i>Diplopterygium glaucum</i>                         | Moniliformopses<br>(early diverged<br>leptosporangiate ferns) | KF225594 | 49.8          | 0.47 | 0.41 | 0.33 | 0.4   |
| <i>Osmunda cinnamomea</i>                             | Moniliformopses<br>(early diverged<br>leptosporangiate ferns) | KF225592 | 46.7          | 0.47 | 0.41 | 0.31 | 0.4   |
| <i>Angiopteris evecta</i>                             | Moniliformopses<br>(eusporangiate ferns)                      | NC008829 | 43.3          | 0.45 | 0.38 | 0.24 | 0.36  |
| <i>Ophioglossum californicum</i>                      | Moniliformopses<br>(eusporangiate ferns)                      | NC020147 | 49.3          | 0.48 | 0.41 | 0.35 | 0.41  |
| <i>Mankyua chejuensis</i>                             | Moniliformopses<br>(eusporangiate ferns)                      | NC017006 | 46            | 0.46 | 0.39 | 0.29 | 0.38  |
| <i>Psilotum nudum</i>                                 | Moniliformopses<br>(eusporangiate ferns)                      | NC003386 | 43.5          | 0.45 | 0.38 | 0.26 | 0.36  |
| <i>Equisetum arvense</i>                              | Moniliformopses<br>(eusporangiate ferns)                      | NC014699 | 40.1          | 0.44 | 0.36 | 0.21 | 0.34  |
| <i>Equisetum hyemale</i>                              | Moniliformopses<br>(eusporangiate ferns)                      | NC020146 | 41.2          | 0.43 | 0.36 | 0.22 | 0.34  |
| <i>Ginkgo biloba</i>                                  | Ginkgophyta                                                   | NC016986 | 47.7          | 0.48 | 0.4  | 0.3  | 0.39  |
| <i>Ephedra equisetina</i>                             | Gnetophyta                                                    | NC011954 | 44.7          | 0.44 | 0.35 | 0.26 | 0.35  |
| <i>Gnetum parvifolium</i>                             | Gnetophyta                                                    | NC011942 | 48            | 0.45 | 0.37 | 0.3  | 0.37  |
| <i>Welwitschia mirabilis</i>                          | Gnetophyta                                                    | NC010654 | 45.5          | 0.44 | 0.36 | 0.27 | 0.36  |
| <i>Cycas revoluta</i>                                 | Cycadophyta                                                   | NC020319 | 47.9          | 0.47 | 0.39 | 0.3  | 0.39  |
| <i>Cycas taitungensis</i>                             | Cycadophyta                                                   | NC009618 | 47.8          | 0.47 | 0.39 | 0.3  | 0.39  |
| <i>Cathaya argyrophylla</i>                           | Pinophyta                                                     | NC014589 | 48            | 0.49 | 0.4  | 0.3  | 0.4   |
| <i>Cedrus deodara</i>                                 | Pinophyta                                                     | NC014575 | 46.6          | 0.48 | 0.39 | 0.31 | 0.39  |
| <i>Cephalotaxus wilsoniana</i>                        | Pinophyta                                                     | NC016063 | 46.4          | 0.45 | 0.36 | 0.27 | 0.36  |
| <i>Cryptomeria japonica</i>                           | Pinophyta                                                     | NC010548 | 45            | 0.46 | 0.37 | 0.28 | 0.37  |
| <i>Keteleeria davidiana</i>                           | Pinophyta                                                     | NC011930 | 46.9          | 0.48 | 0.39 | 0.3  | 0.39  |

| Taxa                                                  | Group                             | GenBank  | ENC<br>(mean) | GC1  | GC2  | GC3  | GCall |
|-------------------------------------------------------|-----------------------------------|----------|---------------|------|------|------|-------|
| <i>Larix decidua</i>                                  | Pinophyta                         | NC016058 | 47.6          | 0.48 | 0.39 | 0.3  | 0.39  |
| <i>Picea morrissonicola</i>                           | Pinophyta                         | NC016069 | 47.6          | 0.48 | 0.39 | 0.31 | 0.39  |
| <i>Picea sitchensis</i>                               | Pinophyta                         | NC011152 | 46.6          | 0.49 | 0.4  | 0.3  | 0.4   |
| <i>Pinus contorta</i>                                 | Pinophyta                         | NC011153 | 47.6          | 0.48 | 0.39 | 0.3  | 0.39  |
| <i>Pinus gerardiana</i>                               | Pinophyta                         | NC011154 | 47.1          | 0.48 | 0.39 | 0.3  | 0.39  |
| <i>Pinus koraiensis</i>                               | Pinophyta                         | NC004677 | 47            | 0.48 | 0.39 | 0.31 | 0.39  |
| <i>Pinus krempfii</i>                                 | Pinophyta                         | NC011155 | 47.2          | 0.48 | 0.39 | 0.31 | 0.39  |
| <i>Pinus lambertiana</i>                              | Pinophyta                         | NC011156 | 47            | 0.48 | 0.39 | 0.31 | 0.39  |
| <i>Pinus monophylla</i>                               | Pinophyta                         | NC011158 | 47.4          | 0.47 | 0.39 | 0.3  | 0.39  |
| <i>Pinus nelsonii</i>                                 | Pinophyta                         | NC011159 | 47.5          | 0.48 | 0.39 | 0.3  | 0.39  |
| <i>Pinus thunbergii</i>                               | Pinophyta                         | NC001631 | 47.7          | 0.5  | 0.4  | 0.3  | 0.4   |
| <i>Podocarpus totara</i>                              | Pinophyta                         | NC020361 | 48.2          | 0.47 | 0.37 | 0.3  | 0.38  |
| <i>Pseudotsuga sinensis</i> var.<br><i>wilsoniana</i> | Pinophyta                         | NC016064 | 47.6          | 0.48 | 0.39 | 0.3  | 0.39  |
| <i>Taiwania cryptomerioides</i>                       | Pinophyta                         | NC016065 | 45.6          | 0.45 | 0.36 | 0.26 | 0.36  |
| <i>Taxus mairei</i>                                   | Pinophyta                         | NC020321 | 45.8          | 0.46 | 0.38 | 0.27 | 0.37  |
| <i>Amborella trichopoda</i>                           | Magnoliophyta<br>(Basal lineages) | NC005086 | 48.3          | 0.46 | 0.39 | 0.32 | 0.39  |
| <i>Chloranthus spicatus</i>                           | Magnoliophyta<br>(Basal lineages) | NC009598 | 47.1          | 0.46 | 0.39 | 0.32 | 0.39  |
| <i>Illicium oligandrum</i>                            | Magnoliophyta<br>(Basal lineages) | NC009600 | 47.8          | 0.47 | 0.39 | 0.32 | 0.39  |
| <i>Nuphar advena</i>                                  | Magnoliophyta<br>(Basal lineages) | NC008788 | 48.4          | 0.46 | 0.39 | 0.32 | 0.39  |
| <i>Nymphaea alba</i>                                  | Magnoliophyta<br>(Basal lineages) | NC006050 | 48.1          | 0.46 | 0.39 | 0.32 | 0.39  |
| <i>Trithuria inconspicua</i>                          | Magnoliophyta<br>(Basal lineages) | NC020372 | 48.6          | 0.47 | 0.38 | 0.34 | 0.4   |
| <i>Ceratophyllum demersum</i>                         | Ceratophyllales                   | NC009962 | 47.5          | 0.46 | 0.39 | 0.31 | 0.38  |
| <i>Aethionema cordifolium</i>                         | Eudicotyledons                    | NC009265 | 45.6          | 0.45 | 0.38 | 0.29 | 0.37  |
| <i>Ageratina adenophora</i>                           | Eudicotyledons                    | NC015621 | 47.2          | 0.46 | 0.39 | 0.3  | 0.38  |
| <i>Anthriscus cerefolium</i>                          | Eudicotyledons                    | NC015113 | 47.6          | 0.45 | 0.38 | 0.3  | 0.38  |
| <i>Arabidopsis thaliana</i>                           | Eudicotyledons                    | NC000932 | 45.8          | 0.45 | 0.38 | 0.29 | 0.37  |
| <i>Arabis hirsuta</i>                                 | Eudicotyledons                    | NC009268 | 45.8          | 0.45 | 0.38 | 0.29 | 0.37  |
| <i>Atropa belladonna</i>                              | Eudicotyledons                    | NC004561 | 46.8          | 0.46 | 0.38 | 0.3  | 0.38  |
| <i>Barbarea verna</i>                                 | Eudicotyledons                    | NC009269 | 45.4          | 0.45 | 0.38 | 0.29 | 0.37  |
| <i>Boea hygrometrica</i>                              | Eudicotyledons                    | NC016468 | 46.9          | 0.45 | 0.38 | 0.3  | 0.38  |
| <i>Brassica napus</i>                                 | Eudicotyledons                    | NC016734 | 45.9          | 0.45 | 0.37 | 0.29 | 0.37  |
| <i>Buxus microphylla</i>                              | Eudicotyledons                    | NC009599 | 47.8          | 0.46 | 0.38 | 0.31 | 0.38  |
| <i>California macrophylla</i>                         | Eudicotyledons                    | NC019611 | 47.6          | 0.48 | 0.4  | 0.31 | 0.4   |
| <i>Camellia sinensis</i>                              | Eudicotyledons                    | NC020019 | 46.4          | 0.45 | 0.38 | 0.29 | 0.38  |
| <i>Capsella bursa-pastoris</i>                        | Eudicotyledons                    | NC009270 | 45.9          | 0.45 | 0.38 | 0.29 | 0.37  |
| <i>Capsicum annuum</i>                                | Eudicotyledons                    | NC018552 | 47.2          | 0.46 | 0.38 | 0.31 | 0.38  |
| <i>Carica papaya</i>                                  | Eudicotyledons                    | NC010323 | 46.2          | 0.46 | 0.38 | 0.3  | 0.38  |
| <i>Castanea mollissima</i>                            | Eudicotyledons                    | NC014674 | 46.6          | 0.45 | 0.38 | 0.3  | 0.38  |
| <i>Chrysanthemum indicum</i>                          | Eudicotyledons                    | NC020320 | 46.9          | 0.46 | 0.38 | 0.3  | 0.38  |
| <i>Cicer arietinum</i>                                | Eudicotyledons                    | NC011163 | 46            | 0.45 | 0.37 | 0.27 | 0.36  |
| <i>Citrus sinensis</i>                                | Eudicotyledons                    | NC008334 | 48.6          | 0.46 | 0.38 | 0.32 | 0.39  |
| <i>Coffea arabica</i>                                 | Eudicotyledons                    | NC008535 | 46.6          | 0.46 | 0.38 | 0.3  | 0.38  |
| <i>Corynocarpus laevigata</i>                         | Eudicotyledons                    | NC014807 | 46            | 0.46 | 0.38 | 0.29 | 0.38  |
| <i>Crucihimalaya wallichii</i>                        | Eudicotyledons                    | NC009271 | 46.1          | 0.45 | 0.38 | 0.29 | 0.37  |
| <i>Cucumis melo</i> subsp. <i>melo</i>                | Eudicotyledons                    | NC015983 | 45.9          | 0.45 | 0.38 | 0.3  | 0.38  |

| Taxa                                                    | Group          | GenBank  | ENC<br>(mean) | GC1  | GC2  | GC3  | GCAll |
|---------------------------------------------------------|----------------|----------|---------------|------|------|------|-------|
| <i>Cuscuta exaltata</i>                                 | Eudicotyledons | NC009963 | 47.7          | 0.47 | 0.39 | 0.31 | 0.39  |
| <i>Datura stramonium</i>                                | Eudicotyledons | NC018117 | 47.3          | 0.46 | 0.38 | 0.31 | 0.38  |
| <i>Daucus carota</i>                                    | Eudicotyledons | NC008325 | 47.3          | 0.46 | 0.38 | 0.3  | 0.38  |
| <i>Draba nemorosa</i>                                   | Eudicotyledons | NC009272 | 45.7          | 0.45 | 0.38 | 0.29 | 0.37  |
| <i>Eleutherococcus senticosus</i>                       | Eudicotyledons | NC016430 | 47.5          | 0.46 | 0.38 | 0.31 | 0.38  |
| <i>Epifagus virginiana</i>                              | Eudicotyledons | NC001568 | 44.3          | 0.41 | 0.36 | 0.29 | 0.35  |
| <i>Erodium carvifolium</i>                              | Eudicotyledons | NC015083 | 50.3          | 0.48 | 0.4  | 0.33 | 0.4   |
| <i>Eucalyptus globulus</i> subsp.<br><i>globulus</i>    | Eudicotyledons | NC008115 | 46.4          | 0.45 | 0.38 | 0.3  | 0.38  |
| <i>Fagopyrum esculentum</i> subsp.<br><i>ancestrale</i> | Eudicotyledons | NC010776 | 47.6          | 0.46 | 0.38 | 0.31 | 0.38  |
| <i>Fragaria chiloensis</i>                              | Eudicotyledons | NC019601 | 47.2          | 0.46 | 0.38 | 0.3  | 0.38  |
| <i>Geranium palmatum</i>                                | Eudicotyledons | NC014573 | 48.1          | 0.48 | 0.4  | 0.32 | 0.4   |
| <i>Glycine max</i>                                      | Eudicotyledons | NC007942 | 45.1          | 0.44 | 0.37 | 0.27 | 0.36  |
| <i>Gossypium arboreum</i>                               | Eudicotyledons | NC016712 | 48            | 0.46 | 0.38 | 0.31 | 0.38  |
| <i>Guizotia abyssinica</i>                              | Eudicotyledons | NC010601 | 46.7          | 0.46 | 0.38 | 0.3  | 0.38  |
| <i>Helianthus annuus</i>                                | Eudicotyledons | NC007977 | 47.2          | 0.46 | 0.38 | 0.3  | 0.38  |
| <i>Hevea brasiliensis</i>                               | Eudicotyledons | NC015308 | 46.4          | 0.45 | 0.37 | 0.29 | 0.37  |
| <i>Ipomoea purpurea</i>                                 | Eudicotyledons | NC009808 | 47.9          | 0.45 | 0.38 | 0.3  | 0.38  |
| <i>Jacobaea vulgaris</i>                                | Eudicotyledons | NC015543 | 46.7          | 0.45 | 0.38 | 0.3  | 0.38  |
| <i>Jasminum nudiflorum</i>                              | Eudicotyledons | NC008407 | 47            | 0.46 | 0.38 | 0.31 | 0.38  |
| <i>Jatropha curcas</i>                                  | Eudicotyledons | NC012224 | 46.4          | 0.45 | 0.38 | 0.29 | 0.37  |
| <i>Lactuca sativa</i>                                   | Eudicotyledons | NC007578 | 46.7          | 0.46 | 0.39 | 0.3  | 0.38  |
| <i>Lathyrus sativus</i>                                 | Eudicotyledons | NC014063 | 45.9          | 0.45 | 0.37 | 0.28 | 0.37  |
| <i>Lepidium virginicum</i>                              | Eudicotyledons | NC009273 | 45.6          | 0.45 | 0.38 | 0.29 | 0.37  |
| <i>Lobularia maritima</i>                               | Eudicotyledons | NC009274 | 45.9          | 0.45 | 0.38 | 0.29 | 0.37  |
| <i>Lotus japonicus</i>                                  | Eudicotyledons | NC002694 | 45.8          | 0.44 | 0.37 | 0.29 | 0.37  |
| <i>Manihot esculenta</i>                                | Eudicotyledons | NC010433 | 46.6          | 0.45 | 0.38 | 0.28 | 0.37  |
| <i>Medicago truncatula</i>                              | Eudicotyledons | NC003119 | 45            | 0.45 | 0.37 | 0.27 | 0.36  |
| <i>Megaleranthis saniculifolia</i>                      | Eudicotyledons | NC012615 | 46.7          | 0.46 | 0.39 | 0.31 | 0.38  |
| <i>Millettia pinnata</i>                                | Eudicotyledons | NC016708 | 45.8          | 0.44 | 0.37 | 0.27 | 0.36  |
| <i>Monsonia speciosa</i>                                | Eudicotyledons | NC014582 | 49.5          | 0.49 | 0.4  | 0.35 | 0.41  |
| <i>Morus indica</i>                                     | Eudicotyledons | NC008359 | 46.1          | 0.45 | 0.38 | 0.29 | 0.37  |
| <i>Nandina domestica</i>                                | Eudicotyledons | NC008336 | 46.4          | 0.46 | 0.39 | 0.31 | 0.39  |
| <i>Nasturtium officinale</i>                            | Eudicotyledons | NC009275 | 45.4          | 0.45 | 0.38 | 0.29 | 0.37  |
| <i>Nelumbo lutea</i>                                    | Eudicotyledons | NC015605 | 46.8          | 0.46 | 0.39 | 0.31 | 0.39  |
| <i>Nicotiana glauca</i>                                 | Eudicotyledons | NC007500 | 47            | 0.46 | 0.38 | 0.3  | 0.38  |
| <i>Oenothera argillicola</i>                            | Eudicotyledons | NC010358 | 47.4          | 0.48 | 0.38 | 0.33 | 0.4   |
| <i>Olea europaea</i> subsp. <i>europaea</i>             | Eudicotyledons | NC015401 | 46.8          | 0.46 | 0.38 | 0.3  | 0.38  |
| <i>Olimarabidopsis pumila</i>                           | Eudicotyledons | NC009267 | 46            | 0.45 | 0.38 | 0.29 | 0.37  |
| <i>Pachycladon ensyisii</i>                             | Eudicotyledons | NC018565 | 45.5          | 0.45 | 0.38 | 0.29 | 0.37  |
| <i>Panax ginseng</i>                                    | Eudicotyledons | NC006290 | 47            | 0.46 | 0.38 | 0.31 | 0.38  |
| <i>Parthenium argentatum</i>                            | Eudicotyledons | NC013553 | 46.5          | 0.48 | 0.41 | 0.29 | 0.39  |
| <i>Pelargonium x hortorum</i>                           | Eudicotyledons | NC008454 | 48.2          | 0.47 | 0.38 | 0.34 | 0.4   |
| <i>Pentactina rupicola</i>                              | Eudicotyledons | NC016921 | 46.6          | 0.45 | 0.38 | 0.3  | 0.38  |
| <i>Phaseolus vulgaris</i>                               | Eudicotyledons | NC009259 | 44.4          | 0.44 | 0.37 | 0.27 | 0.36  |
| <i>Pisum sativum</i>                                    | Eudicotyledons | NC014057 | 45.1          | 0.45 | 0.38 | 0.28 | 0.37  |
| <i>Platanus occidentalis</i>                            | Eudicotyledons | NC008335 | 47.9          | 0.46 | 0.39 | 0.31 | 0.39  |
| <i>Populus alba</i>                                     | Eudicotyledons | NC008235 | 46.1          | 0.45 | 0.38 | 0.3  | 0.38  |

| Taxa                                                  | Group          | GenBank  | ENC<br>(mean) | GC1  | GC2  | GC3  | GCall |
|-------------------------------------------------------|----------------|----------|---------------|------|------|------|-------|
| <i>Prunus persica</i>                                 | Eudicotyledons | NC014697 | 47.2          | 0.45 | 0.38 | 0.3  | 0.38  |
| <i>Pyrus pyrifolia</i>                                | Eudicotyledons | NC015996 | 46.9          | 0.45 | 0.38 | 0.3  | 0.38  |
| <i>Quercus rubra</i>                                  | Eudicotyledons | NC020152 | 46.8          | 0.45 | 0.38 | 0.31 | 0.38  |
| <i>Ranunculus macranthus</i>                          | Eudicotyledons | NC008796 | 46.9          | 0.46 | 0.38 | 0.3  | 0.38  |
| <i>Ricinus communis</i>                               | Eudicotyledons | NC016736 | 46.6          | 0.45 | 0.38 | 0.3  | 0.37  |
| <i>Sesamum indicum</i>                                | Eudicotyledons | NC016433 | 46.5          | 0.46 | 0.39 | 0.3  | 0.38  |
| <i>Silene conica</i>                                  | Eudicotyledons | NC016729 | 46.4          | 0.45 | 0.37 | 0.29 | 0.37  |
| <i>Solanum bulbocastanum</i>                          | Eudicotyledons | NC007943 | 46.7          | 0.46 | 0.38 | 0.31 | 0.38  |
| <i>Spinacia oleracea</i>                              | Eudicotyledons | NC002202 | 46.2          | 0.46 | 0.38 | 0.28 | 0.37  |
| <i>Tectona grandis</i>                                | Eudicotyledons | NC020098 | 46.6          | 0.46 | 0.38 | 0.31 | 0.38  |
| <i>Theobroma cacao</i>                                | Eudicotyledons | NC014676 | 46.9          | 0.46 | 0.38 | 0.3  | 0.38  |
| <i>Trachelium caeruleum</i>                           | Eudicotyledons | NC010442 | 46.5          | 0.46 | 0.38 | 0.31 | 0.38  |
| <i>Trifolium subterraneum</i>                         | Eudicotyledons | NC011828 | 46            | 0.47 | 0.38 | 0.28 | 0.38  |
| <i>Vaccinium macrocarpon</i>                          | Eudicotyledons | NC019616 | 46.5          | 0.47 | 0.39 | 0.28 | 0.38  |
| <i>Vigna radiata</i>                                  | Eudicotyledons | NC013843 | 43.8          | 0.44 | 0.37 | 0.27 | 0.36  |
| <i>Vitis vinifera</i>                                 | Eudicotyledons | NC007957 | 46.4          | 0.46 | 0.38 | 0.3  | 0.38  |
| <i>Acidosasa purpurea</i>                             | Monocotyledons | NC015820 | 47.8          | 0.47 | 0.4  | 0.31 | 0.39  |
| <i>Acorus americanus</i>                              | Monocotyledons | NC010093 | 48.2          | 0.47 | 0.39 | 0.31 | 0.39  |
| <i>Agrostis stolonifera</i>                           | Monocotyledons | NC008591 | 47.6          | 0.47 | 0.4  | 0.3  | 0.39  |
| <i>Anomochloa marantoidea</i>                         | Monocotyledons | NC014062 | 47.3          | 0.47 | 0.39 | 0.3  | 0.39  |
| <i>Arundinaria gigantea</i>                           | Monocotyledons | NC020341 | 47.9          | 0.48 | 0.4  | 0.31 | 0.39  |
| <i>Bambusa emeiensis</i>                              | Monocotyledons | NC015830 | 48            | 0.47 | 0.4  | 0.31 | 0.39  |
| <i>Bismarckia nobilis</i>                             | Monocotyledons | NC020366 | 47            | 0.45 | 0.38 | 0.3  | 0.38  |
| <i>Brachypodium distachyon</i>                        | Monocotyledons | NC011032 | 48.3          | 0.47 | 0.4  | 0.3  | 0.39  |
| <i>Calamus caryotoides</i>                            | Monocotyledons | NC020365 | 47            | 0.45 | 0.38 | 0.3  | 0.38  |
| <i>Coix lacryma-jobi</i>                              | Monocotyledons | NC013273 | 47.6          | 0.48 | 0.4  | 0.3  | 0.39  |
| <i>Colocasia esculenta</i>                            | Monocotyledons | NC016753 | 45.9          | 0.46 | 0.39 | 0.3  | 0.38  |
| <i>Dasypogon bromeliifolius</i>                       | Monocotyledons | NC020367 | 47.3          | 0.45 | 0.38 | 0.3  | 0.38  |
| <i>Dendrocalamus latiflorus</i>                       | Monocotyledons | NC013088 | 47.7          | 0.47 | 0.4  | 0.31 | 0.39  |
| <i>Dioscorea elephantipes</i>                         | Monocotyledons | NC009601 | 46.3          | 0.45 | 0.38 | 0.3  | 0.38  |
| <i>Elaeis guineensis</i>                              | Monocotyledons | NC017602 | 46.8          | 0.45 | 0.38 | 0.3  | 0.38  |
| <i>Eloдея canadensis</i>                              | Monocotyledons | NC018541 | 47            | 0.46 | 0.38 | 0.29 | 0.38  |
| <i>Erycina pusilla</i>                                | Monocotyledons | NC018114 | 45.2          | 0.46 | 0.39 | 0.3  | 0.38  |
| <i>Ferocalamus rimosivaginus</i>                      | Monocotyledons | NC015831 | 48            | 0.47 | 0.4  | 0.31 | 0.39  |
| <i>Festuca altissima</i>                              | Monocotyledons | NC019648 | 47.9          | 0.47 | 0.4  | 0.3  | 0.39  |
| <i>Heliconia collinsiana</i>                          | Monocotyledons | NC020362 | 47            | 0.46 | 0.38 | 0.3  | 0.38  |
| <i>Hordeum vulgare</i> subsp. <i>vulgare</i>          | Monocotyledons | NC008590 | 47.8          | 0.47 | 0.4  | 0.3  | 0.39  |
| <i>Indocalamus longiauritus</i>                       | Monocotyledons | NC015803 | 47.8          | 0.48 | 0.4  | 0.31 | 0.39  |
| <i>Leersia tisserantii</i>                            | Monocotyledons | NC016677 | 48.3          | 0.48 | 0.4  | 0.31 | 0.39  |
| <i>Lemna minor</i>                                    | Monocotyledons | NC010109 | 45.8          | 0.45 | 0.37 | 0.28 | 0.37  |
| <i>Lolium multiflorum</i>                             | Monocotyledons | NC019651 | 48            | 0.47 | 0.4  | 0.3  | 0.39  |
| <i>Neottia nidus avis</i>                             | Monocotyledons | NC016471 | 45.3          | 0.41 | 0.34 | 0.28 | 0.34  |
| <i>Oncidium Gower Ramsey</i>                          | Monocotyledons | NC014056 | 46.5          | 0.47 | 0.39 | 0.3  | 0.39  |
| <i>Oryza nivara</i>                                   | Monocotyledons | NC005973 | 47.9          | 0.48 | 0.4  | 0.31 | 0.39  |
| <i>Panicum virgatum</i>                               | Monocotyledons | NC015990 | 47.5          | 0.48 | 0.4  | 0.31 | 0.39  |
| <i>Phalaenopsis aphrodite</i> subsp. <i>formosana</i> | Monocotyledons | NC007499 | 46.5          | 0.47 | 0.39 | 0.3  | 0.39  |
| <i>Phoenix dactylifera</i>                            | Monocotyledons | NC013991 | 46.9          | 0.45 | 0.38 | 0.3  | 0.38  |
| <i>Phyllostachys edulis</i>                           | Monocotyledons | NC015817 | 48            | 0.48 | 0.4  | 0.31 | 0.39  |

| Taxa                                            | Group          | GenBank  | ENC<br>(mean) | GC1  | GC2  | GC3  | GCall |
|-------------------------------------------------|----------------|----------|---------------|------|------|------|-------|
| <i>Pseudophoenix vinifera</i>                   | Monocotyledons | NC020364 | 46.9          | 0.45 | 0.38 | 0.3  | 0.38  |
| <i>Rhizanthella gardneri</i>                    | Monocotyledons | NC014874 | 48            | 0.41 | 0.35 | 0.32 | 0.36  |
| <i>Rhynchozoa subulata</i>                      | Monocotyledons | NC016718 | 48            | 0.48 | 0.4  | 0.31 | 0.39  |
| <i>Saccharum hybrid</i> cultivar NCo<br>310     | Monocotyledons | NC006084 | 47.4          | 0.47 | 0.4  | 0.3  | 0.39  |
| <i>Smilax china</i>                             | Monocotyledons | HM536959 | 47.6          | 0.46 | 0.39 | 0.31 | 0.39  |
| <i>Sorghum bicolor</i>                          | Monocotyledons | NC008602 | 47.5          | 0.47 | 0.4  | 0.3  | 0.39  |
| <i>Spirodela polyrhiza</i>                      | Monocotyledons | NC015891 | 46.3          | 0.45 | 0.38 | 0.29 | 0.37  |
| <i>Triticum aestivum</i>                        | Monocotyledons | NC002762 | 47.4          | 0.47 | 0.4  | 0.3  | 0.39  |
| <i>Typha latifolia</i>                          | Monocotyledons | NC013823 | 47.1          | 0.45 | 0.38 | 0.29 | 0.38  |
| <i>Wolffia australiana</i>                      | Monocotyledons | NC015899 | 45.3          | 0.45 | 0.37 | 0.28 | 0.37  |
| <i>Zea mays</i>                                 | Monocotyledons | NC001666 | 47.7          | 0.47 | 0.4  | 0.3  | 0.39  |
| <i>Zingiber spectabile</i>                      | Monocotyledons | NC020363 | 45.8          | 0.45 | 0.38 | 0.29 | 0.37  |
| <i>Calycanthus floridus</i> var. <i>glaucus</i> | Magnoliids     | NC004993 | 47.8          | 0.46 | 0.39 | 0.32 | 0.39  |
| <i>Drimys granadensis</i>                       | Magnoliids     | NC008456 | 47.3          | 0.46 | 0.39 | 0.32 | 0.39  |
| <i>Liriodendron tulipifera</i>                  | Magnoliids     | NC008326 | 48.1          | 0.46 | 0.39 | 0.32 | 0.39  |
| <i>Magnolia denudata</i>                        | Magnoliids     | NC018357 | 47.8          | 0.46 | 0.39 | 0.32 | 0.39  |
| <i>Piper cenocladum</i>                         | Magnoliids     | NC008457 | 48.2          | 0.46 | 0.39 | 0.32 | 0.39  |

Supplemental table 1. List of genes found in chloroplast genome of three species

| Group of gene              |                                                 | Common genes                                                                                                                                                                                                                                                                                                                     | <i>O. cinnamomea</i>                                                                                               | <i>D. glaucum</i>                                                        | <i>L. japonicum</i>                        |
|----------------------------|-------------------------------------------------|----------------------------------------------------------------------------------------------------------------------------------------------------------------------------------------------------------------------------------------------------------------------------------------------------------------------------------|--------------------------------------------------------------------------------------------------------------------|--------------------------------------------------------------------------|--------------------------------------------|
| RNA genes                  | Ribosomal RNAs                                  | <i>rrn4.5(x2), rrn5(x2), rrn16(x2), rrn23(x2)</i>                                                                                                                                                                                                                                                                                |                                                                                                                    |                                                                          |                                            |
|                            | Transfer RNAs                                   | <i>trnA-UGC<sup>a</sup>(x2), trnC-GCA, trnD-GUC, trnE-UUC, trnF-GAA, trnFM-CAU, trnG-GCC, trnG-UCC<sup>a</sup>, trnI-CAU, trnI-GAU<sup>a</sup>(x2), trnL-UAG, trnM-CAU, trnN-GUU(x2), trnP-GGG, trnP-UGG, trnQ-UUG, trnR-ACG(x2), trnR-UCU, trnS-GCU, trnS-GGA, trnS-UGA, trnT-GGU, trnV-UAC<sup>a</sup>, trnW-CCA, trnY-GUA</i> | <i>trnH-GUG, trnK-CUU<sup>a</sup>, trnL-CAA, trnL-UAA<sup>a</sup>, trnR-CCG, trnS-CGA, trnT-UGU, trnV-GAC(x2),</i> | <i>trnH-GUG, trnL-CAA(x2), trnL-UAA<sup>a</sup>, trnR-CCG, trnV-GAC,</i> | <i>trnH-GUG(x2), trnL-UAA<sup>a</sup>,</i> |
| Protein genes              | Photosynthesis                                  |                                                                                                                                                                                                                                                                                                                                  |                                                                                                                    |                                                                          |                                            |
|                            | Photosystem I                                   | <i>psaA, psaB, psaC, psal, psaJ, psaM</i>                                                                                                                                                                                                                                                                                        |                                                                                                                    |                                                                          |                                            |
|                            | Photosystem II                                  | <i>psbA, psbB, psbC, psbD, psbE, psbF, psbH, psbI, psbJ, psbK, psbL, psbM, psbN, psbT, psbZ</i>                                                                                                                                                                                                                                  |                                                                                                                    |                                                                          |                                            |
|                            | Cytochrome                                      | <i>petA, petB<sup>a</sup>, petD<sup>a</sup>, petG, petL, petN</i>                                                                                                                                                                                                                                                                |                                                                                                                    |                                                                          |                                            |
|                            | ATP synthase                                    | <i>atpA, atpB, atpE, atpF<sup>a</sup>, atpH, atpI</i>                                                                                                                                                                                                                                                                            |                                                                                                                    |                                                                          |                                            |
|                            | Chlorophyll biosynthesis                        | <i>chlB, chlL, chlN</i>                                                                                                                                                                                                                                                                                                          |                                                                                                                    |                                                                          |                                            |
|                            | Rubisco                                         | <i>rbcL</i>                                                                                                                                                                                                                                                                                                                      |                                                                                                                    |                                                                          |                                            |
|                            | NADH dehydrogenase                              | <i>ndhA<sup>a</sup>, ndhB<sup>a</sup>, ndhC, ndhD, ndhE, ndhF, ndhG, ndhH, ndhI, ndhJ, ndhK</i>                                                                                                                                                                                                                                  |                                                                                                                    |                                                                          |                                            |
|                            | ATP-dependent protease subunit P                | <i>clpP<sup>a</sup></i>                                                                                                                                                                                                                                                                                                          |                                                                                                                    |                                                                          |                                            |
|                            | Chloroplast envelope membrane protein           | <i>cemA</i>                                                                                                                                                                                                                                                                                                                      |                                                                                                                    |                                                                          |                                            |
| Ribosomal proteins         | large units                                     | <i>rpl2<sup>a</sup>, rpl14, rpl16<sup>a</sup>, rpl20, rpl21, rpl22, rpl23, rpl32, rpl33, rpl36</i>                                                                                                                                                                                                                               |                                                                                                                    |                                                                          |                                            |
|                            | small units                                     | <i>rps2, rps3, rps4, rps7, rps8, rps11, rps12<sup>a</sup>, rps14, rps15, rps16, rps18, rps19</i>                                                                                                                                                                                                                                 |                                                                                                                    |                                                                          |                                            |
| Transcription /translation | RNA polymerase                                  | <i>rpoA, rpoB, rpoC2</i>                                                                                                                                                                                                                                                                                                         | <i>rpoC1<sup>a</sup></i>                                                                                           | <i>rpoC1<sup>a</sup></i>                                                 | <i>rpoC1</i>                               |
|                            | Initiation factor                               | <i>infA</i>                                                                                                                                                                                                                                                                                                                      |                                                                                                                    |                                                                          |                                            |
|                            | Miscellaneous proteins                          | <i>accD, ccsA, matK</i>                                                                                                                                                                                                                                                                                                          |                                                                                                                    |                                                                          |                                            |
|                            | Hypothetical proteins & Conserved reading frame | <i>ycf2, ycf3<sup>a</sup>, ycf4, ycf12</i>                                                                                                                                                                                                                                                                                       | <i>φycf1</i>                                                                                                       | <i>ycf1</i>                                                              | <i>φycf1</i>                               |
| Total                      |                                                 |                                                                                                                                                                                                                                                                                                                                  | 130                                                                                                                | 128                                                                      | 124                                        |

Supplemental table 2. The list of GC contents and ENC of 194 chloroplast genomes

| Taxa                                                  | Group                                                      | GenBank  | ENC<br>(mean) | GC1  | GC2  | GC3  | GCall |
|-------------------------------------------------------|------------------------------------------------------------|----------|---------------|------|------|------|-------|
| <i>Anthceros formosae</i>                             | Anthocerotophyta                                           | NC004543 | 41.6          | 0.44 | 0.39 | 0.22 | 0.35  |
| <i>Nothoceros aenigmaticus</i>                        | Anthocerotophyta                                           | NC020259 | 44.7          | 0.44 | 0.38 | 0.27 | 0.36  |
| <i>Physcomitrella patens</i> subsp.<br><i>patens</i>  | Bryophyta                                                  | NC005087 | 34.8          | 0.41 | 0.35 | 0.13 | 0.3   |
| <i>Syntrichia ruralis</i>                             | Bryophyta                                                  | NC012052 | 35            | 0.41 | 0.35 | 0.13 | 0.3   |
| <i>Aneura mirabilis</i>                               | Marchantiophyta                                            | NC010359 | 47.8          | 0.46 | 0.4  | 0.32 | 0.39  |
| <i>Marchantia polymorpha</i>                          | Marchantiophyta                                            | NC001319 | 34.6          | 0.43 | 0.36 | 0.12 | 0.3   |
| <i>Pellia endiviifolia</i>                            | Marchantiophyta                                            | NC019628 | 45.1          | 0.44 | 0.37 | 0.26 | 0.36  |
| <i>Ptilidium pulcherrimum</i>                         | Marchantiophyta                                            | NC015402 | 40.2          | 0.43 | 0.37 | 0.2  | 0.33  |
| <i>Huperzia lucidula</i>                              | Lycopodiophyta                                             | NC006861 | 44.9          | 0.46 | 0.38 | 0.26 | 0.37  |
| <i>Isoetes flaccida</i>                               | Lycopodiophyta                                             | NC014675 | 47            | 0.47 | 0.39 | 0.28 | 0.38  |
| <i>Selaginella moellendorffii</i>                     | Lycopodiophyta                                             | NC013086 | 54            | 0.56 | 0.51 | 0.45 | 0.51  |
| <i>Selaginella uncinata</i>                           | Lycopodiophyta                                             | AB197035 | 55.4          | 0.59 | 0.55 | 0.49 | 0.54  |
| <i>Adiantum capillus-veneris</i>                      | Pteridophyta<br>(core leptosporangiate ferns)              | NC004766 | 52            | 0.47 | 0.41 | 0.37 | 0.42  |
| <i>Cheilanthes lindheimeri</i>                        | Pteridophyta<br>(core leptosporangiate ferns)              | NC014592 | 52.2          | 0.48 | 0.41 | 0.38 | 0.42  |
| <i>Pteridium aquilinum</i> subsp.<br><i>aquilinum</i> | Pteridophyta<br>(core leptosporangiate ferns)              | NC014348 | 52.1          | 0.48 | 0.41 | 0.36 | 0.41  |
| <i>Alsophila spinulosa</i>                            | Pteridophyta<br>(core leptosporangiate ferns)              | NC012818 | 51.3          | 0.47 | 0.41 | 0.34 | 0.41  |
| <i>Marsilea crenata</i>                               | Pteridophyta<br>(core leptosporangiate ferns)              | KC536646 | 52.7          | 0.49 | 0.41 | 0.37 | 0.42  |
| <i>Lygodium japonicum</i>                             | Pteridophyta<br>(early diverged<br>leptosporangiate ferns) | KF225593 | 49.7          | 0.47 | 0.4  | 0.36 | 0.41  |
| <i>Diplopterigium glaucum</i>                         | Pteridophyta<br>(early diverged<br>leptosporangiate ferns) | KF225594 | 49.8          | 0.47 | 0.41 | 0.33 | 0.4   |
| <i>Osmunda cinnamomea</i>                             | Pteridophyta<br>(early diverged<br>leptosporangiate ferns) | KF225592 | 46.7          | 0.47 | 0.41 | 0.31 | 0.4   |
| <i>Angiopteris evecta</i>                             | Pteridophyta<br>(eusporangiate ferns)                      | NC008829 | 43.3          | 0.45 | 0.38 | 0.24 | 0.36  |
| <i>Ophioglossum californicum</i>                      | Pteridophyta<br>(eusporangiate ferns)                      | NC020147 | 49.3          | 0.48 | 0.41 | 0.35 | 0.41  |
| <i>Mankyua chejuensis</i>                             | Pteridophyta<br>(eusporangiate ferns)                      | NC017006 | 46            | 0.46 | 0.39 | 0.29 | 0.38  |
| <i>Psilotum nudum</i>                                 | Pteridophyta<br>(eusporangiate ferns)                      | NC003386 | 43.5          | 0.45 | 0.38 | 0.26 | 0.36  |
| <i>Equisetum arvense</i>                              | Pteridophyta<br>(eusporangiate ferns)                      | NC014699 | 40.1          | 0.44 | 0.36 | 0.21 | 0.34  |
| <i>Equisetum hyemale</i>                              | Pteridophyta<br>(eusporangiate ferns)                      | NC020146 | 41.2          | 0.43 | 0.36 | 0.22 | 0.34  |
| <i>Ginkgo biloba</i>                                  | Ginkgophyta                                                | NC016986 | 47.7          | 0.48 | 0.4  | 0.3  | 0.39  |
| <i>Ephedra equisetina</i>                             | Gnetophyta                                                 | NC011954 | 44.7          | 0.44 | 0.35 | 0.26 | 0.35  |
| <i>Gnetum parvifolium</i>                             | Gnetophyta                                                 | NC011942 | 48            | 0.45 | 0.37 | 0.3  | 0.37  |
| <i>Welwitschia mirabilis</i>                          | Gnetophyta                                                 | NC010654 | 45.5          | 0.44 | 0.36 | 0.27 | 0.36  |
| <i>Cycas revoluta</i>                                 | Cycadophyta                                                | NC020319 | 47.9          | 0.47 | 0.39 | 0.3  | 0.39  |
| <i>Cycas taitungensis</i>                             | Cycadophyta                                                | NC009618 | 47.8          | 0.47 | 0.39 | 0.3  | 0.39  |
| <i>Cathaya argyrophylla</i>                           | Pinophyta                                                  | NC014589 | 48            | 0.49 | 0.4  | 0.3  | 0.4   |
| <i>Cedrus deodara</i>                                 | Pinophyta                                                  | NC014575 | 46.6          | 0.48 | 0.39 | 0.31 | 0.39  |
| <i>Cephalotaxus wilsoniana</i>                        | Pinophyta                                                  | NC016063 | 46.4          | 0.45 | 0.36 | 0.27 | 0.36  |
| <i>Cryptomeria japonica</i>                           | Pinophyta                                                  | NC010548 | 45            | 0.46 | 0.37 | 0.28 | 0.37  |
| <i>Keteleeria davidiana</i>                           | Pinophyta                                                  | NC011930 | 46.9          | 0.48 | 0.39 | 0.3  | 0.39  |

| Taxa                                                  | Group                             | GenBank  | ENC<br>(mean) | GC1  | GC2  | GC3  | GCall |
|-------------------------------------------------------|-----------------------------------|----------|---------------|------|------|------|-------|
| <i>Larix decidua</i>                                  | Pinophyta                         | NC016058 | 47.6          | 0.48 | 0.39 | 0.3  | 0.39  |
| <i>Picea morrissonicola</i>                           | Pinophyta                         | NC016069 | 47.6          | 0.48 | 0.39 | 0.31 | 0.39  |
| <i>Picea sitchensis</i>                               | Pinophyta                         | NC011152 | 46.6          | 0.49 | 0.4  | 0.3  | 0.4   |
| <i>Pinus contorta</i>                                 | Pinophyta                         | NC011153 | 47.6          | 0.48 | 0.39 | 0.3  | 0.39  |
| <i>Pinus gerardiana</i>                               | Pinophyta                         | NC011154 | 47.1          | 0.48 | 0.39 | 0.3  | 0.39  |
| <i>Pinus koraiensis</i>                               | Pinophyta                         | NC004677 | 47            | 0.48 | 0.39 | 0.31 | 0.39  |
| <i>Pinus krempfii</i>                                 | Pinophyta                         | NC011155 | 47.2          | 0.48 | 0.39 | 0.31 | 0.39  |
| <i>Pinus lambertiana</i>                              | Pinophyta                         | NC011156 | 47            | 0.48 | 0.39 | 0.31 | 0.39  |
| <i>Pinus monophylla</i>                               | Pinophyta                         | NC011158 | 47.4          | 0.47 | 0.39 | 0.3  | 0.39  |
| <i>Pinus nelsonii</i>                                 | Pinophyta                         | NC011159 | 47.5          | 0.48 | 0.39 | 0.3  | 0.39  |
| <i>Pinus thunbergii</i>                               | Pinophyta                         | NC001631 | 47.7          | 0.5  | 0.4  | 0.3  | 0.4   |
| <i>Podocarpus totara</i>                              | Pinophyta                         | NC020361 | 48.2          | 0.47 | 0.37 | 0.3  | 0.38  |
| <i>Pseudotsuga sinensis</i> var.<br><i>wilsoniana</i> | Pinophyta                         | NC016064 | 47.6          | 0.48 | 0.39 | 0.3  | 0.39  |
| <i>Taiwania cryptomerioides</i>                       | Pinophyta                         | NC016065 | 45.6          | 0.45 | 0.36 | 0.26 | 0.36  |
| <i>Taxus mairei</i>                                   | Pinophyta                         | NC020321 | 45.8          | 0.46 | 0.38 | 0.27 | 0.37  |
| <i>Amborella trichopoda</i>                           | Magnoliophyta<br>(Basal lineages) | NC005086 | 48.3          | 0.46 | 0.39 | 0.32 | 0.39  |
| <i>Chloranthus spicatus</i>                           | Magnoliophyta<br>(Basal lineages) | NC009598 | 47.1          | 0.46 | 0.39 | 0.32 | 0.39  |
| <i>Illicium oligandrum</i>                            | Magnoliophyta<br>(Basal lineages) | NC009600 | 47.8          | 0.47 | 0.39 | 0.32 | 0.39  |
| <i>Nuphar advena</i>                                  | Magnoliophyta<br>(Basal lineages) | NC008788 | 48.4          | 0.46 | 0.39 | 0.32 | 0.39  |
| <i>Nymphaea alba</i>                                  | Magnoliophyta<br>(Basal lineages) | NC006050 | 48.1          | 0.46 | 0.39 | 0.32 | 0.39  |
| <i>Trithuria inconspicua</i>                          | Magnoliophyta<br>(Basal lineages) | NC020372 | 48.6          | 0.47 | 0.38 | 0.34 | 0.4   |
| <i>Ceratophyllum demersum</i>                         | Ceratophyllales                   | NC009962 | 47.5          | 0.46 | 0.39 | 0.31 | 0.38  |
| <i>Aethionema cordifolium</i>                         | Eudicotyledons                    | NC009265 | 45.6          | 0.45 | 0.38 | 0.29 | 0.37  |
| <i>Ageratina adenophora</i>                           | Eudicotyledons                    | NC015621 | 47.2          | 0.46 | 0.39 | 0.3  | 0.38  |
| <i>Anthriscus cerefolium</i>                          | Eudicotyledons                    | NC015113 | 47.6          | 0.45 | 0.38 | 0.3  | 0.38  |
| <i>Arabidopsis thaliana</i>                           | Eudicotyledons                    | NC000932 | 45.8          | 0.45 | 0.38 | 0.29 | 0.37  |
| <i>Arabis hirsuta</i>                                 | Eudicotyledons                    | NC009268 | 45.8          | 0.45 | 0.38 | 0.29 | 0.37  |
| <i>Atropa belladonna</i>                              | Eudicotyledons                    | NC004561 | 46.8          | 0.46 | 0.38 | 0.3  | 0.38  |
| <i>Barbarea verna</i>                                 | Eudicotyledons                    | NC009269 | 45.4          | 0.45 | 0.38 | 0.29 | 0.37  |
| <i>Boea hygrometrica</i>                              | Eudicotyledons                    | NC016468 | 46.9          | 0.45 | 0.38 | 0.3  | 0.38  |
| <i>Brassica napus</i>                                 | Eudicotyledons                    | NC016734 | 45.9          | 0.45 | 0.37 | 0.29 | 0.37  |
| <i>Buxus microphylla</i>                              | Eudicotyledons                    | NC009599 | 47.8          | 0.46 | 0.38 | 0.31 | 0.38  |
| <i>California macrophylla</i>                         | Eudicotyledons                    | NC019611 | 47.6          | 0.48 | 0.4  | 0.31 | 0.4   |
| <i>Camellia sinensis</i>                              | Eudicotyledons                    | NC020019 | 46.4          | 0.45 | 0.38 | 0.29 | 0.38  |
| <i>Capsella bursa-pastoris</i>                        | Eudicotyledons                    | NC009270 | 45.9          | 0.45 | 0.38 | 0.29 | 0.37  |
| <i>Capsicum annuum</i>                                | Eudicotyledons                    | NC018552 | 47.2          | 0.46 | 0.38 | 0.31 | 0.38  |
| <i>Carica papaya</i>                                  | Eudicotyledons                    | NC010323 | 46.2          | 0.46 | 0.38 | 0.3  | 0.38  |
| <i>Castanea mollissima</i>                            | Eudicotyledons                    | NC014674 | 46.6          | 0.45 | 0.38 | 0.3  | 0.38  |
| <i>Chrysanthemum indicum</i>                          | Eudicotyledons                    | NC020320 | 46.9          | 0.46 | 0.38 | 0.3  | 0.38  |
| <i>Cicer arietinum</i>                                | Eudicotyledons                    | NC011163 | 46            | 0.45 | 0.37 | 0.27 | 0.36  |
| <i>Citrus sinensis</i>                                | Eudicotyledons                    | NC008334 | 48.6          | 0.46 | 0.38 | 0.32 | 0.39  |
| <i>Coffea arabica</i>                                 | Eudicotyledons                    | NC008535 | 46.6          | 0.46 | 0.38 | 0.3  | 0.38  |
| <i>Corynocarpus laevigata</i>                         | Eudicotyledons                    | NC014807 | 46            | 0.46 | 0.38 | 0.29 | 0.38  |
| <i>Crucihimalaya wallichii</i>                        | Eudicotyledons                    | NC009271 | 46.1          | 0.45 | 0.38 | 0.29 | 0.37  |
| <i>Cucumis melo</i> subsp. <i>melo</i>                | Eudicotyledons                    | NC015983 | 45.9          | 0.45 | 0.38 | 0.3  | 0.38  |



| Taxa                                                    | Group          | GenBank  | ENC<br>(mean) | GC1  | GC2  | GC3  | GCAll |
|---------------------------------------------------------|----------------|----------|---------------|------|------|------|-------|
| <i>Cuscuta exaltata</i>                                 | Eudicotyledons | NC009963 | 47.7          | 0.47 | 0.39 | 0.31 | 0.39  |
| <i>Datura stramonium</i>                                | Eudicotyledons | NC018117 | 47.3          | 0.46 | 0.38 | 0.31 | 0.38  |
| <i>Daucus carota</i>                                    | Eudicotyledons | NC008325 | 47.3          | 0.46 | 0.38 | 0.3  | 0.38  |
| <i>Draba nemorosa</i>                                   | Eudicotyledons | NC009272 | 45.7          | 0.45 | 0.38 | 0.29 | 0.37  |
| <i>Eleutherococcus senticosus</i>                       | Eudicotyledons | NC016430 | 47.5          | 0.46 | 0.38 | 0.31 | 0.38  |
| <i>Epifagus virginiana</i>                              | Eudicotyledons | NC001568 | 44.3          | 0.41 | 0.36 | 0.29 | 0.35  |
| <i>Erodium carvifolium</i>                              | Eudicotyledons | NC015083 | 50.3          | 0.48 | 0.4  | 0.33 | 0.4   |
| <i>Eucalyptus globulus</i> subsp.<br><i>globulus</i>    | Eudicotyledons | NC008115 | 46.4          | 0.45 | 0.38 | 0.3  | 0.38  |
| <i>Fagopyrum esculentum</i> subsp.<br><i>ancestrale</i> | Eudicotyledons | NC010776 | 47.6          | 0.46 | 0.38 | 0.31 | 0.38  |
| <i>Fragaria chiloensis</i>                              | Eudicotyledons | NC019601 | 47.2          | 0.46 | 0.38 | 0.3  | 0.38  |
| <i>Geranium palmatum</i>                                | Eudicotyledons | NC014573 | 48.1          | 0.48 | 0.4  | 0.32 | 0.4   |
| <i>Glycine max</i>                                      | Eudicotyledons | NC007942 | 45.1          | 0.44 | 0.37 | 0.27 | 0.36  |
| <i>Gossypium arboreum</i>                               | Eudicotyledons | NC016712 | 48            | 0.46 | 0.38 | 0.31 | 0.38  |
| <i>Guizotia abyssinica</i>                              | Eudicotyledons | NC010601 | 46.7          | 0.46 | 0.38 | 0.3  | 0.38  |
| <i>Helianthus annuus</i>                                | Eudicotyledons | NC007977 | 47.2          | 0.46 | 0.38 | 0.3  | 0.38  |
| <i>Hevea brasiliensis</i>                               | Eudicotyledons | NC015308 | 46.4          | 0.45 | 0.37 | 0.29 | 0.37  |
| <i>Ipomoea purpurea</i>                                 | Eudicotyledons | NC009808 | 47.9          | 0.45 | 0.38 | 0.3  | 0.38  |
| <i>Jacobaea vulgaris</i>                                | Eudicotyledons | NC015543 | 46.7          | 0.45 | 0.38 | 0.3  | 0.38  |
| <i>Jasminum nudiflorum</i>                              | Eudicotyledons | NC008407 | 47            | 0.46 | 0.38 | 0.31 | 0.38  |
| <i>Jatropha curcas</i>                                  | Eudicotyledons | NC012224 | 46.4          | 0.45 | 0.38 | 0.29 | 0.37  |
| <i>Lactuca sativa</i>                                   | Eudicotyledons | NC007578 | 46.7          | 0.46 | 0.39 | 0.3  | 0.38  |
| <i>Lathyrus sativus</i>                                 | Eudicotyledons | NC014063 | 45.9          | 0.45 | 0.37 | 0.28 | 0.37  |
| <i>Lepidium virginicum</i>                              | Eudicotyledons | NC009273 | 45.6          | 0.45 | 0.38 | 0.29 | 0.37  |
| <i>Lobularia maritima</i>                               | Eudicotyledons | NC009274 | 45.9          | 0.45 | 0.38 | 0.29 | 0.37  |
| <i>Lotus japonicus</i>                                  | Eudicotyledons | NC002694 | 45.8          | 0.44 | 0.37 | 0.29 | 0.37  |
| <i>Manihot esculenta</i>                                | Eudicotyledons | NC010433 | 46.6          | 0.45 | 0.38 | 0.28 | 0.37  |
| <i>Medicago truncatula</i>                              | Eudicotyledons | NC003119 | 45            | 0.45 | 0.37 | 0.27 | 0.36  |
| <i>Megaleranthis saniculifolia</i>                      | Eudicotyledons | NC012615 | 46.7          | 0.46 | 0.39 | 0.31 | 0.38  |
| <i>Millettia pinnata</i>                                | Eudicotyledons | NC016708 | 45.8          | 0.44 | 0.37 | 0.27 | 0.36  |
| <i>Monsonia speciosa</i>                                | Eudicotyledons | NC014582 | 49.5          | 0.49 | 0.4  | 0.35 | 0.41  |
| <i>Morus indica</i>                                     | Eudicotyledons | NC008359 | 46.1          | 0.45 | 0.38 | 0.29 | 0.37  |
| <i>Nandina domestica</i>                                | Eudicotyledons | NC008336 | 46.4          | 0.46 | 0.39 | 0.31 | 0.39  |
| <i>Nasturtium officinale</i>                            | Eudicotyledons | NC009275 | 45.4          | 0.45 | 0.38 | 0.29 | 0.37  |
| <i>Nelumbo lutea</i>                                    | Eudicotyledons | NC015605 | 46.8          | 0.46 | 0.39 | 0.31 | 0.39  |
| <i>Nicotiana glauca</i>                                 | Eudicotyledons | NC007500 | 47            | 0.46 | 0.38 | 0.3  | 0.38  |
| <i>Oenothera argillicola</i>                            | Eudicotyledons | NC010358 | 47.4          | 0.48 | 0.38 | 0.33 | 0.4   |
| <i>Olea europaea</i> subsp. <i>europaea</i>             | Eudicotyledons | NC015401 | 46.8          | 0.46 | 0.38 | 0.3  | 0.38  |
| <i>Olimarabidopsis pumila</i>                           | Eudicotyledons | NC009267 | 46            | 0.45 | 0.38 | 0.29 | 0.37  |
| <i>Pachycladon ensyisii</i>                             | Eudicotyledons | NC018565 | 45.5          | 0.45 | 0.38 | 0.29 | 0.37  |
| <i>Panax ginseng</i>                                    | Eudicotyledons | NC006290 | 47            | 0.46 | 0.38 | 0.31 | 0.38  |
| <i>Parthenium argentatum</i>                            | Eudicotyledons | NC013553 | 46.5          | 0.48 | 0.41 | 0.29 | 0.39  |
| <i>Pelargonium x hortorum</i>                           | Eudicotyledons | NC008454 | 48.2          | 0.47 | 0.38 | 0.34 | 0.4   |
| <i>Pentactina rupicola</i>                              | Eudicotyledons | NC016921 | 46.6          | 0.45 | 0.38 | 0.3  | 0.38  |
| <i>Phaseolus vulgaris</i>                               | Eudicotyledons | NC009259 | 44.4          | 0.44 | 0.37 | 0.27 | 0.36  |
| <i>Pisum sativum</i>                                    | Eudicotyledons | NC014057 | 45.1          | 0.45 | 0.38 | 0.28 | 0.37  |
| <i>Platanus occidentalis</i>                            | Eudicotyledons | NC008335 | 47.9          | 0.46 | 0.39 | 0.31 | 0.39  |
| <i>Populus alba</i>                                     | Eudicotyledons | NC008235 | 46.1          | 0.45 | 0.38 | 0.3  | 0.38  |

| Taxa                                                  | Group          | GenBank  | ENC<br>(mean) | GC1  | GC2  | GC3  | GCall |
|-------------------------------------------------------|----------------|----------|---------------|------|------|------|-------|
| <i>Prunus persica</i>                                 | Eudicotyledons | NC014697 | 47.2          | 0.45 | 0.38 | 0.3  | 0.38  |
| <i>Pyrus pyrifolia</i>                                | Eudicotyledons | NC015996 | 46.9          | 0.45 | 0.38 | 0.3  | 0.38  |
| <i>Quercus rubra</i>                                  | Eudicotyledons | NC020152 | 46.8          | 0.45 | 0.38 | 0.31 | 0.38  |
| <i>Ranunculus macranthus</i>                          | Eudicotyledons | NC008796 | 46.9          | 0.46 | 0.38 | 0.3  | 0.38  |
| <i>Ricinus communis</i>                               | Eudicotyledons | NC016736 | 46.6          | 0.45 | 0.38 | 0.3  | 0.37  |
| <i>Sesamum indicum</i>                                | Eudicotyledons | NC016433 | 46.5          | 0.46 | 0.39 | 0.3  | 0.38  |
| <i>Silene conica</i>                                  | Eudicotyledons | NC016729 | 46.4          | 0.45 | 0.37 | 0.29 | 0.37  |
| <i>Solanum bulbocastanum</i>                          | Eudicotyledons | NC007943 | 46.7          | 0.46 | 0.38 | 0.31 | 0.38  |
| <i>Spinacia oleracea</i>                              | Eudicotyledons | NC002202 | 46.2          | 0.46 | 0.38 | 0.28 | 0.37  |
| <i>Tectona grandis</i>                                | Eudicotyledons | NC020098 | 46.6          | 0.46 | 0.38 | 0.31 | 0.38  |
| <i>Theobroma cacao</i>                                | Eudicotyledons | NC014676 | 46.9          | 0.46 | 0.38 | 0.3  | 0.38  |
| <i>Trachelium caeruleum</i>                           | Eudicotyledons | NC010442 | 46.5          | 0.46 | 0.38 | 0.31 | 0.38  |
| <i>Trifolium subterraneum</i>                         | Eudicotyledons | NC011828 | 46            | 0.47 | 0.38 | 0.28 | 0.38  |
| <i>Vaccinium macrocarpon</i>                          | Eudicotyledons | NC019616 | 46.5          | 0.47 | 0.39 | 0.28 | 0.38  |
| <i>Vigna radiata</i>                                  | Eudicotyledons | NC013843 | 43.8          | 0.44 | 0.37 | 0.27 | 0.36  |
| <i>Vitis vinifera</i>                                 | Eudicotyledons | NC007957 | 46.4          | 0.46 | 0.38 | 0.3  | 0.38  |
| <i>Acidosasa purpurea</i>                             | Monocotyledons | NC015820 | 47.8          | 0.47 | 0.4  | 0.31 | 0.39  |
| <i>Acorus americanus</i>                              | Monocotyledons | NC010093 | 48.2          | 0.47 | 0.39 | 0.31 | 0.39  |
| <i>Agrostis stolonifera</i>                           | Monocotyledons | NC008591 | 47.6          | 0.47 | 0.4  | 0.3  | 0.39  |
| <i>Anomochloa marantoidea</i>                         | Monocotyledons | NC014062 | 47.3          | 0.47 | 0.39 | 0.3  | 0.39  |
| <i>Arundinaria gigantea</i>                           | Monocotyledons | NC020341 | 47.9          | 0.48 | 0.4  | 0.31 | 0.39  |
| <i>Bambusa emeiensis</i>                              | Monocotyledons | NC015830 | 48            | 0.47 | 0.4  | 0.31 | 0.39  |
| <i>Bismarckia nobilis</i>                             | Monocotyledons | NC020366 | 47            | 0.45 | 0.38 | 0.3  | 0.38  |
| <i>Brachypodium distachyon</i>                        | Monocotyledons | NC011032 | 48.3          | 0.47 | 0.4  | 0.3  | 0.39  |
| <i>Calamus caryotoides</i>                            | Monocotyledons | NC020365 | 47            | 0.45 | 0.38 | 0.3  | 0.38  |
| <i>Coix lacryma-jobi</i>                              | Monocotyledons | NC013273 | 47.6          | 0.48 | 0.4  | 0.3  | 0.39  |
| <i>Colocasia esculenta</i>                            | Monocotyledons | NC016753 | 45.9          | 0.46 | 0.39 | 0.3  | 0.38  |
| <i>Dasypogon bromeliifolius</i>                       | Monocotyledons | NC020367 | 47.3          | 0.45 | 0.38 | 0.3  | 0.38  |
| <i>Dendrocalamus latiflorus</i>                       | Monocotyledons | NC013088 | 47.7          | 0.47 | 0.4  | 0.31 | 0.39  |
| <i>Dioscorea elephantipes</i>                         | Monocotyledons | NC009601 | 46.3          | 0.45 | 0.38 | 0.3  | 0.38  |
| <i>Elaeis guineensis</i>                              | Monocotyledons | NC017602 | 46.8          | 0.45 | 0.38 | 0.3  | 0.38  |
| <i>Eloдея canadensis</i>                              | Monocotyledons | NC018541 | 47            | 0.46 | 0.38 | 0.29 | 0.38  |
| <i>Erycina pusilla</i>                                | Monocotyledons | NC018114 | 45.2          | 0.46 | 0.39 | 0.3  | 0.38  |
| <i>Ferocalamus rimosivaginus</i>                      | Monocotyledons | NC015831 | 48            | 0.47 | 0.4  | 0.31 | 0.39  |
| <i>Festuca altissima</i>                              | Monocotyledons | NC019648 | 47.9          | 0.47 | 0.4  | 0.3  | 0.39  |
| <i>Heliconia collinsiana</i>                          | Monocotyledons | NC020362 | 47            | 0.46 | 0.38 | 0.3  | 0.38  |
| <i>Hordeum vulgare</i> subsp. <i>vulgare</i>          | Monocotyledons | NC008590 | 47.8          | 0.47 | 0.4  | 0.3  | 0.39  |
| <i>Indocalamus longiauritus</i>                       | Monocotyledons | NC015803 | 47.8          | 0.48 | 0.4  | 0.31 | 0.39  |
| <i>Leersia tisserantii</i>                            | Monocotyledons | NC016677 | 48.3          | 0.48 | 0.4  | 0.31 | 0.39  |
| <i>Lemna minor</i>                                    | Monocotyledons | NC010109 | 45.8          | 0.45 | 0.37 | 0.28 | 0.37  |
| <i>Lolium multiflorum</i>                             | Monocotyledons | NC019651 | 48            | 0.47 | 0.4  | 0.3  | 0.39  |
| <i>Neottia nidus avis</i>                             | Monocotyledons | NC016471 | 45.3          | 0.41 | 0.34 | 0.28 | 0.34  |
| <i>Oncidium Gower Ramsey</i>                          | Monocotyledons | NC014056 | 46.5          | 0.47 | 0.39 | 0.3  | 0.39  |
| <i>Oryza nivara</i>                                   | Monocotyledons | NC005973 | 47.9          | 0.48 | 0.4  | 0.31 | 0.39  |
| <i>Panicum virgatum</i>                               | Monocotyledons | NC015990 | 47.5          | 0.48 | 0.4  | 0.31 | 0.39  |
| <i>Phalaenopsis aphrodite</i> subsp. <i>formosana</i> | Monocotyledons | NC007499 | 46.5          | 0.47 | 0.39 | 0.3  | 0.39  |
| <i>Phoenix dactylifera</i>                            | Monocotyledons | NC013991 | 46.9          | 0.45 | 0.38 | 0.3  | 0.38  |
| <i>Phyllostachys edulis</i>                           | Monocotyledons | NC015817 | 48            | 0.48 | 0.4  | 0.31 | 0.39  |

| Taxa                                            | Group          | GenBank  | ENC<br>(mean) | GC1  | GC2  | GC3  | GCall |
|-------------------------------------------------|----------------|----------|---------------|------|------|------|-------|
| <i>Pseudophoenix vinifera</i>                   | Monocotyledons | NC020364 | 46.9          | 0.45 | 0.38 | 0.3  | 0.38  |
| <i>Rhizanthella gardneri</i>                    | Monocotyledons | NC014874 | 48            | 0.41 | 0.35 | 0.32 | 0.36  |
| <i>Rhynchoryza subulata</i>                     | Monocotyledons | NC016718 | 48            | 0.48 | 0.4  | 0.31 | 0.39  |
| <i>Saccharum hybrid</i> cultivar NCo<br>310     | Monocotyledons | NC006084 | 47.4          | 0.47 | 0.4  | 0.3  | 0.39  |
| <i>Smilax china</i>                             | Monocotyledons | HM536959 | 47.6          | 0.46 | 0.39 | 0.31 | 0.39  |
| <i>Sorghum bicolor</i>                          | Monocotyledons | NC008602 | 47.5          | 0.47 | 0.4  | 0.3  | 0.39  |
| <i>Spirodela polyrhiza</i>                      | Monocotyledons | NC015891 | 46.3          | 0.45 | 0.38 | 0.29 | 0.37  |
| <i>Triticum aestivum</i>                        | Monocotyledons | NC002762 | 47.4          | 0.47 | 0.4  | 0.3  | 0.39  |
| <i>Typha latifolia</i>                          | Monocotyledons | NC013823 | 47.1          | 0.45 | 0.38 | 0.29 | 0.38  |
| <i>Wolffia australiana</i>                      | Monocotyledons | NC015899 | 45.3          | 0.45 | 0.37 | 0.28 | 0.37  |
| <i>Zea mays</i>                                 | Monocotyledons | NC001666 | 47.7          | 0.47 | 0.4  | 0.3  | 0.39  |
| <i>Zingiber spectabile</i>                      | Monocotyledons | NC020363 | 45.8          | 0.45 | 0.38 | 0.29 | 0.37  |
| <i>Calycanthus floridus</i> var. <i>glaucus</i> | Magnoliids     | NC004993 | 47.8          | 0.46 | 0.39 | 0.32 | 0.39  |
| <i>Drimys granadensis</i>                       | Magnoliids     | NC008456 | 47.3          | 0.46 | 0.39 | 0.32 | 0.39  |
| <i>Liriodendron tulipifera</i>                  | Magnoliids     | NC008326 | 48.1          | 0.46 | 0.39 | 0.32 | 0.39  |
| <i>Magnolia denudata</i>                        | Magnoliids     | NC018357 | 47.8          | 0.46 | 0.39 | 0.32 | 0.39  |
| <i>Piper cenocladum</i>                         | Magnoliids     | NC008457 | 48.2          | 0.46 | 0.39 | 0.32 | 0.39  |

Supplementary table 2. List of genes found in chloroplast genome of three species

| Group of gene              |                                                 | Common genes                                                                                                                                                                                                                                                                                                                                                                                                                                                                                                                              | <i>O. cinnamomea</i>                                                                                                                                                            | <i>D. glaucum</i>                                                                                           | <i>L. japonicum</i>                                   |
|----------------------------|-------------------------------------------------|-------------------------------------------------------------------------------------------------------------------------------------------------------------------------------------------------------------------------------------------------------------------------------------------------------------------------------------------------------------------------------------------------------------------------------------------------------------------------------------------------------------------------------------------|---------------------------------------------------------------------------------------------------------------------------------------------------------------------------------|-------------------------------------------------------------------------------------------------------------|-------------------------------------------------------|
| RNA genes                  | Ribosomal RNAs                                  | <i>rrn4.5(x2), rrn5(x2), rrn16(x2), rrn23(x2)</i>                                                                                                                                                                                                                                                                                                                                                                                                                                                                                         |                                                                                                                                                                                 |                                                                                                             |                                                       |
|                            | Transfer RNAs                                   | <i>trnA</i> -UGC <sup>a</sup> (x2), <i>trnC</i> -GCA, <i>trnD</i> -GUC, <i>trnE</i> -UUC, <i>trnF</i> -GAA, <i>trnFM</i> -CAU, <i>trnG</i> -GCC, <i>trnG</i> -UCC <sup>a</sup> , <i>trnI</i> -CAU, <i>trnI</i> -GAU <sup>a</sup> (x2), <i>trnL</i> -UAG, <i>trnM</i> -CAU, <i>trnN</i> -GUU(x2), <i>trnP</i> -GGG, <i>trnP</i> -UGG, <i>trnQ</i> -UUG, <i>trnR</i> -ACG(x2), <i>trnR</i> -UCU, <i>trnS</i> -GCU, <i>trnS</i> -GGA, <i>trnS</i> -UGA, <i>trnT</i> -GGU, <i>trnV</i> -UAC <sup>a</sup> , <i>trnW</i> -CCA, <i>trnY</i> -GUA | <i>trnH</i> -GUG, <i>trnK</i> -CUU <sup>a</sup> , <i>trnL</i> -CAA, <i>trnL</i> -UAA <sup>a</sup> , <i>trnR</i> -CCG, <i>trnS</i> -CGA, <i>trnT</i> -UGU, <i>trnV</i> -GAC(x2), | <i>trnH</i> -GUG, <i>trnL</i> -CAA(x2), <i>trnL</i> -UAA <sup>a</sup> , <i>trnR</i> -CCG, <i>trnV</i> -GAC, | <i>trnH</i> -GUG(x2), <i>trnL</i> -UAA <sup>a</sup> , |
| Protein genes              | Photosynthesis                                  |                                                                                                                                                                                                                                                                                                                                                                                                                                                                                                                                           |                                                                                                                                                                                 |                                                                                                             |                                                       |
|                            | Photosystem I                                   | <i>psaA, psaB, psaC, psal, psaJ, psaM</i>                                                                                                                                                                                                                                                                                                                                                                                                                                                                                                 |                                                                                                                                                                                 |                                                                                                             |                                                       |
|                            | Photosystem II                                  | <i>psbA, psbB, psbC, psbD, psbE, psbF, psbH, psbI, psbJ, psbK, psbL, psbM, psbN, psbT, psbZ</i>                                                                                                                                                                                                                                                                                                                                                                                                                                           |                                                                                                                                                                                 |                                                                                                             |                                                       |
|                            | Cytochrome                                      | <i>petA, petB<sup>a</sup>, petD<sup>a</sup>, petG, petL, petN</i>                                                                                                                                                                                                                                                                                                                                                                                                                                                                         |                                                                                                                                                                                 |                                                                                                             |                                                       |
|                            | ATP synthase                                    | <i>atpA, atpB, atpE, atpF<sup>a</sup>, atpH, atpI</i>                                                                                                                                                                                                                                                                                                                                                                                                                                                                                     |                                                                                                                                                                                 |                                                                                                             |                                                       |
|                            | Chlorophyll biosynthesis                        | <i>chlB, chlL, chlN</i>                                                                                                                                                                                                                                                                                                                                                                                                                                                                                                                   |                                                                                                                                                                                 |                                                                                                             |                                                       |
|                            | Rubisco                                         | <i>rbcL</i>                                                                                                                                                                                                                                                                                                                                                                                                                                                                                                                               |                                                                                                                                                                                 |                                                                                                             |                                                       |
|                            | NADH dehydrogenase                              | <i>ndhA<sup>a</sup>, ndhB<sup>a</sup>, ndhC, ndhD, ndhE, ndhF, ndhG, ndhH, ndhI, ndhJ, ndhK</i>                                                                                                                                                                                                                                                                                                                                                                                                                                           |                                                                                                                                                                                 |                                                                                                             |                                                       |
|                            | ATP-dependent protease subunit P                | <i>clpP<sup>a</sup></i>                                                                                                                                                                                                                                                                                                                                                                                                                                                                                                                   |                                                                                                                                                                                 |                                                                                                             |                                                       |
|                            | Chloroplast envelope membrane protein           | <i>cemA</i>                                                                                                                                                                                                                                                                                                                                                                                                                                                                                                                               |                                                                                                                                                                                 |                                                                                                             |                                                       |
| Ribosomal proteins         | large units                                     | <i>rpl2<sup>a</sup>, rpl14, rpl16<sup>a</sup>, rpl20, rpl21, rpl22, rpl23, rpl32, rpl33, rpl36</i>                                                                                                                                                                                                                                                                                                                                                                                                                                        |                                                                                                                                                                                 |                                                                                                             |                                                       |
|                            | small units                                     | <i>rps2, rps3, rps4, rps7, rps8, rps11, rps12<sup>a</sup>, rps14, rps15, rps16, rps18, rps19</i>                                                                                                                                                                                                                                                                                                                                                                                                                                          |                                                                                                                                                                                 |                                                                                                             |                                                       |
| Transcription /translation | RNA polymerase                                  | <i>rpoA, rpoB, rpoC2</i>                                                                                                                                                                                                                                                                                                                                                                                                                                                                                                                  | <i>rpoC1<sup>a</sup></i>                                                                                                                                                        | <i>rpoC1<sup>a</sup></i>                                                                                    | <i>rpoC1</i>                                          |
|                            | Initiation factor                               | <i>infA</i>                                                                                                                                                                                                                                                                                                                                                                                                                                                                                                                               |                                                                                                                                                                                 |                                                                                                             |                                                       |
|                            | Miscellaneous proteins                          | <i>accD, ccsA, matK</i>                                                                                                                                                                                                                                                                                                                                                                                                                                                                                                                   |                                                                                                                                                                                 |                                                                                                             |                                                       |
|                            | Hypothetical proteins & Conserved reading frame | <i>ycf2, ycf3<sup>a</sup>, ycf4, ycf12</i>                                                                                                                                                                                                                                                                                                                                                                                                                                                                                                | <i>φycf1</i>                                                                                                                                                                    | <i>ycf1</i>                                                                                                 | <i>φycf1</i>                                          |
| Total                      |                                                 |                                                                                                                                                                                                                                                                                                                                                                                                                                                                                                                                           | 130                                                                                                                                                                             | 128                                                                                                         | 124                                                   |
